# Supplementary material for: Hierarchical hollow ZnO cubes constructed using self-sacrificial ZIF-8 frameworks and their enhanced benzene gas-sensing properties
Source: Royal Society of Chemistry journal article supplement (doi:10.1039/c5nj00549c), 2015-01-01
Supplement: c5nj00549c1.pdf [file c5nj00549c1.pdf]

## Electronic Supplementary Information (ESI)

### Hierarchical hollow ZnO cubes from self-sacrificial ZIF-8 frameworks and their enhanced benzene gas-sensing properties

Wenhui Li,<sup>ab</sup> Xiaofeng Wu,<sup>a\*</sup> Haidi Liu,<sup>a</sup> Jiayuan Chen,<sup>ab</sup> Wenxiang Tang,<sup>ab</sup> and Yunfa Chen<sup>a\*</sup>

<sup>a</sup> State Key Laboratory of Multi-phase Complex Systems, Institute of Process Engineering, Chinese Academy of Sciences, Beijing 100190, P. R. China

<sup>b</sup> University of Chinese Academy of Sciences, Beijing 100049, P. R. China

E-mail: [wxftsic@ipe.ac.cn](mailto:wxftsic@ipe.ac.cn) or [chenyf@ipe.ac.cn](mailto:chenyf@ipe.ac.cn) Tel.: +86 10 82544896, Fax: +86 10 82544896

#### 1. Materials synthesis

##### 1.1 Synthesis of basic zinc carbonate

Typically, 1.115g (3.75mmol)  $\text{Zn}(\text{NO}_3)_2 \cdot 6\text{H}_2\text{O}$  was dissolved in 2.5ml water. 0.498g (6.3mmol) ammonium bicarbonate was dissolved in 5ml water. After that, the zinc nitrate solution was slowly added into ammonium bicarbonate solution under stirring for 30min. White precipitates was observed and aged for 1h. The products was collected by centrifugation and washing with water three times, then dried at 80 °C overnight.

##### 1.2 Synthesis of singular 0D ZnO particles

The as-synthesized basic zinc carbonate was calcined at 450 °C for 1h in a muffle furnace with a heating rate of 1 °C min<sup>-1</sup>. The products were donated as ZnO-S.

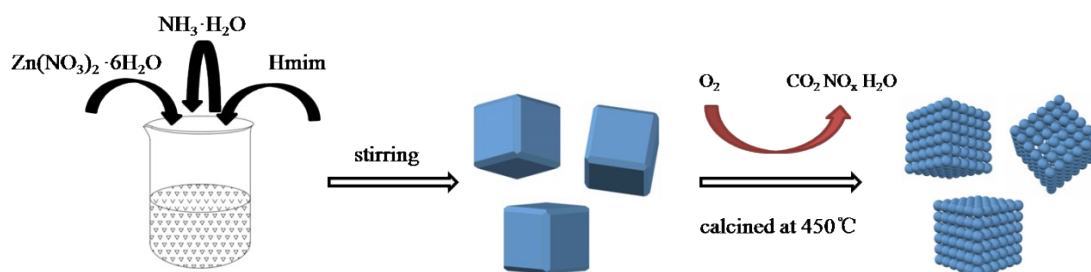

**Fig. S1** Schematic illustration of process to synthesize hierarchical porous ZnO hollow cubes from ZIF-8 frameworks

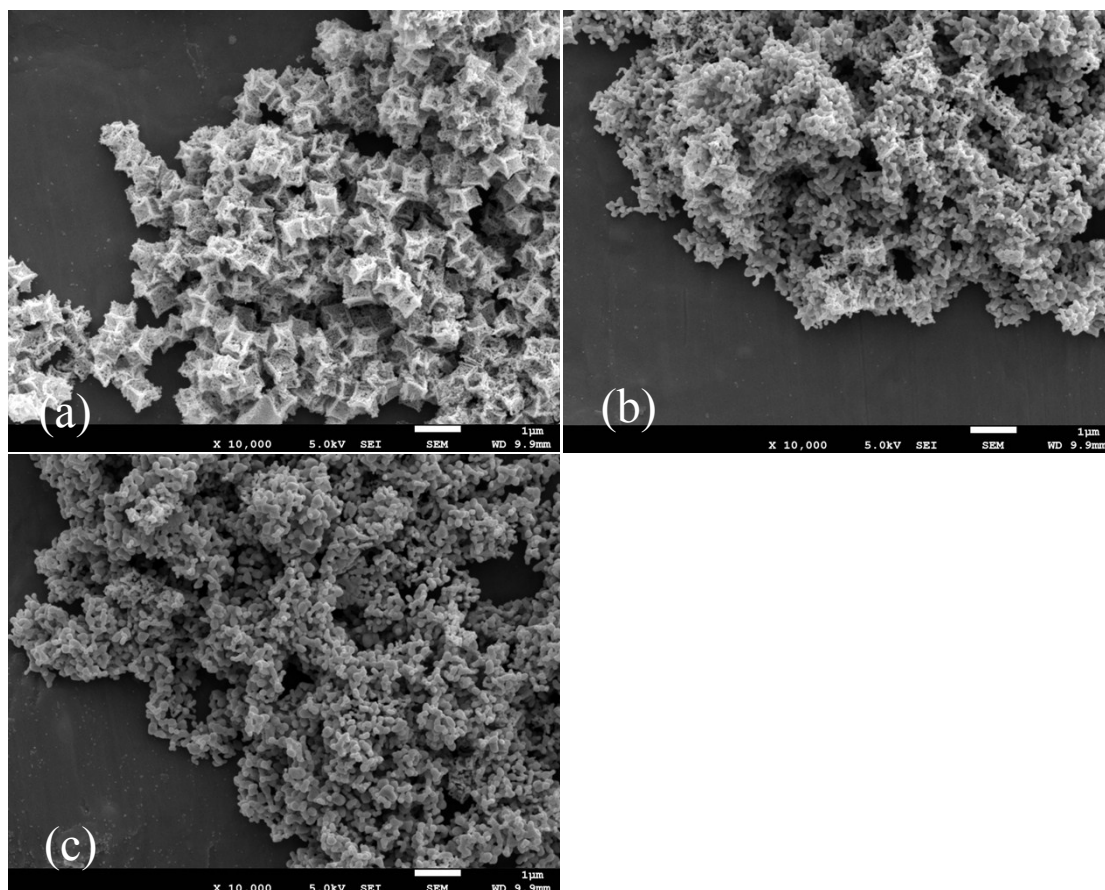

**Fig. S2** SEM images of ZnO at different pyrolysis temperature (a) 450 °C, (b) 550 °C, (c) 650 °C.

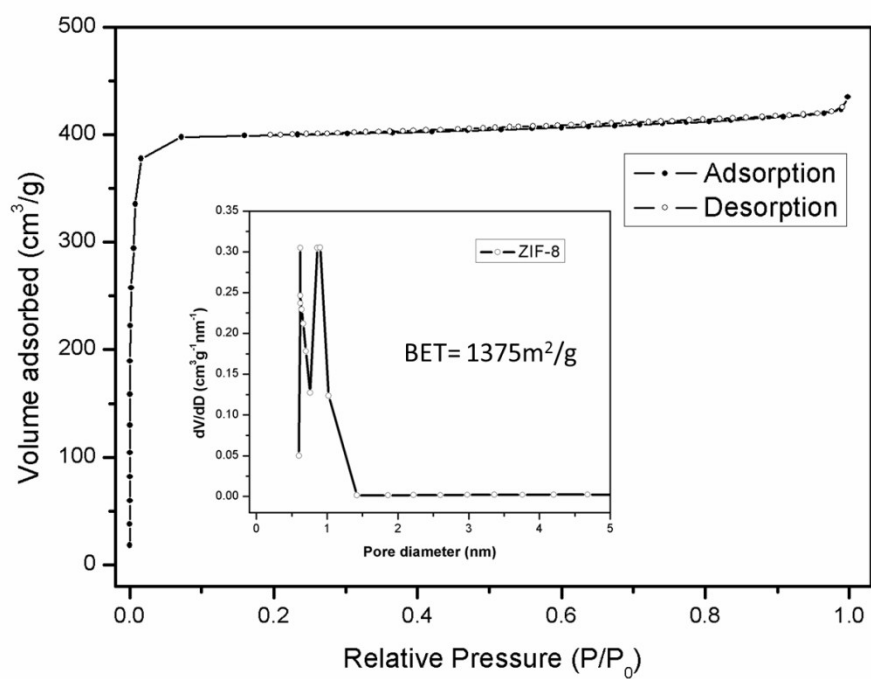

**Fig. S3** N<sub>2</sub> adsorption–desorption isotherms and pore distributions of ZIF-8

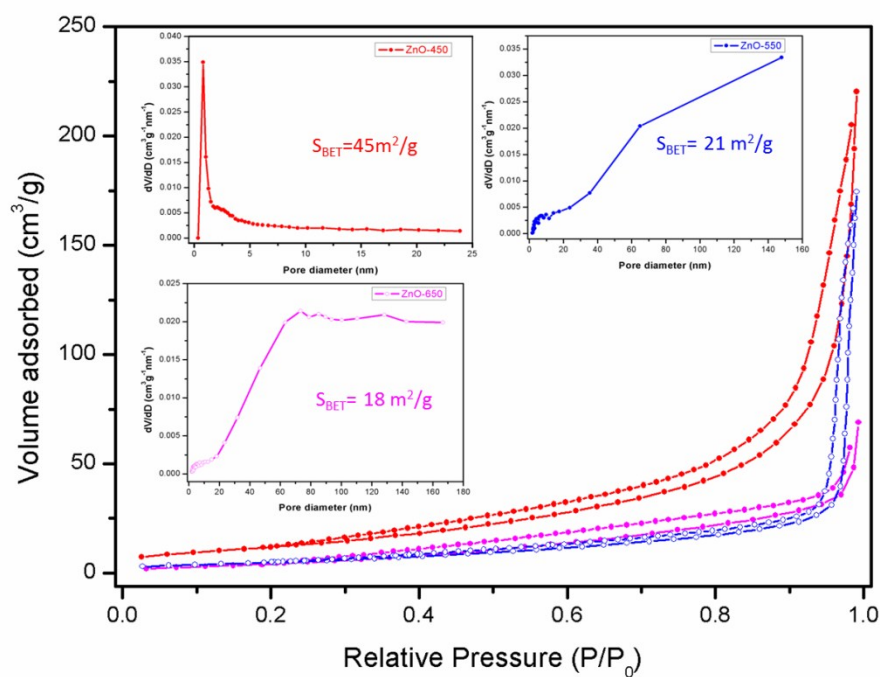

**Fig. S4** N<sub>2</sub> adsorption–desorption isotherms and pore distributions of ZnO at different pyrolysis temperature

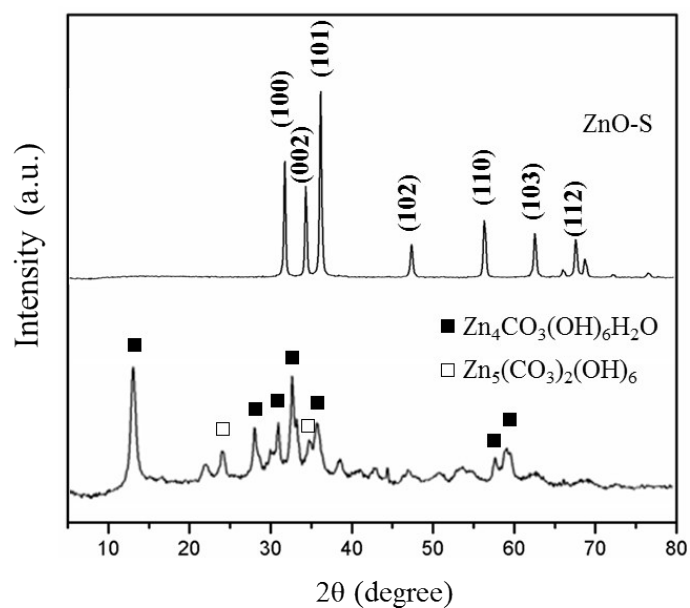

**Fig. S5** XRD patterns of basic zinc carbonate precursors and singular 0D ZnO particles

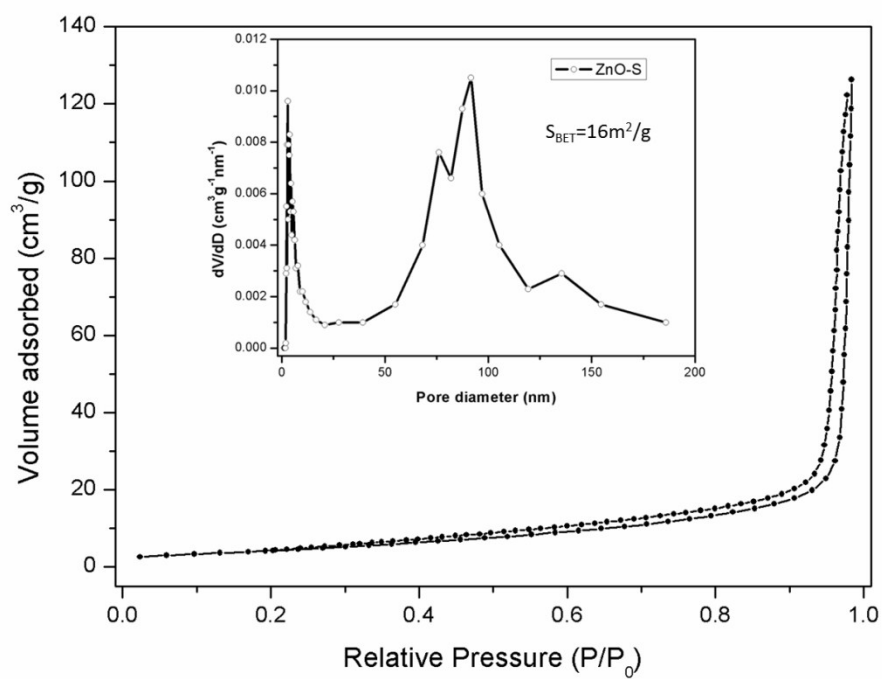

**Fig. S6**  $N_2$  adsorption–desorption isotherms and pore distributions of ZnO prepared from basic zinc carbonate
